# Supplementary figures and images for: Micro-RNA-Regulated SQUAMOSA-PROMOTER BINDING PROTEIN-LIKE (SPL) Gene Expression and Cytokinin Accumulation Distinguish Early-Developing Male and Female Inflorescences in Oil Palm (Elaeis guineensis)
Source: MDPI journal article supplement (doi:10.3390/plants11050685), 2022-03-02

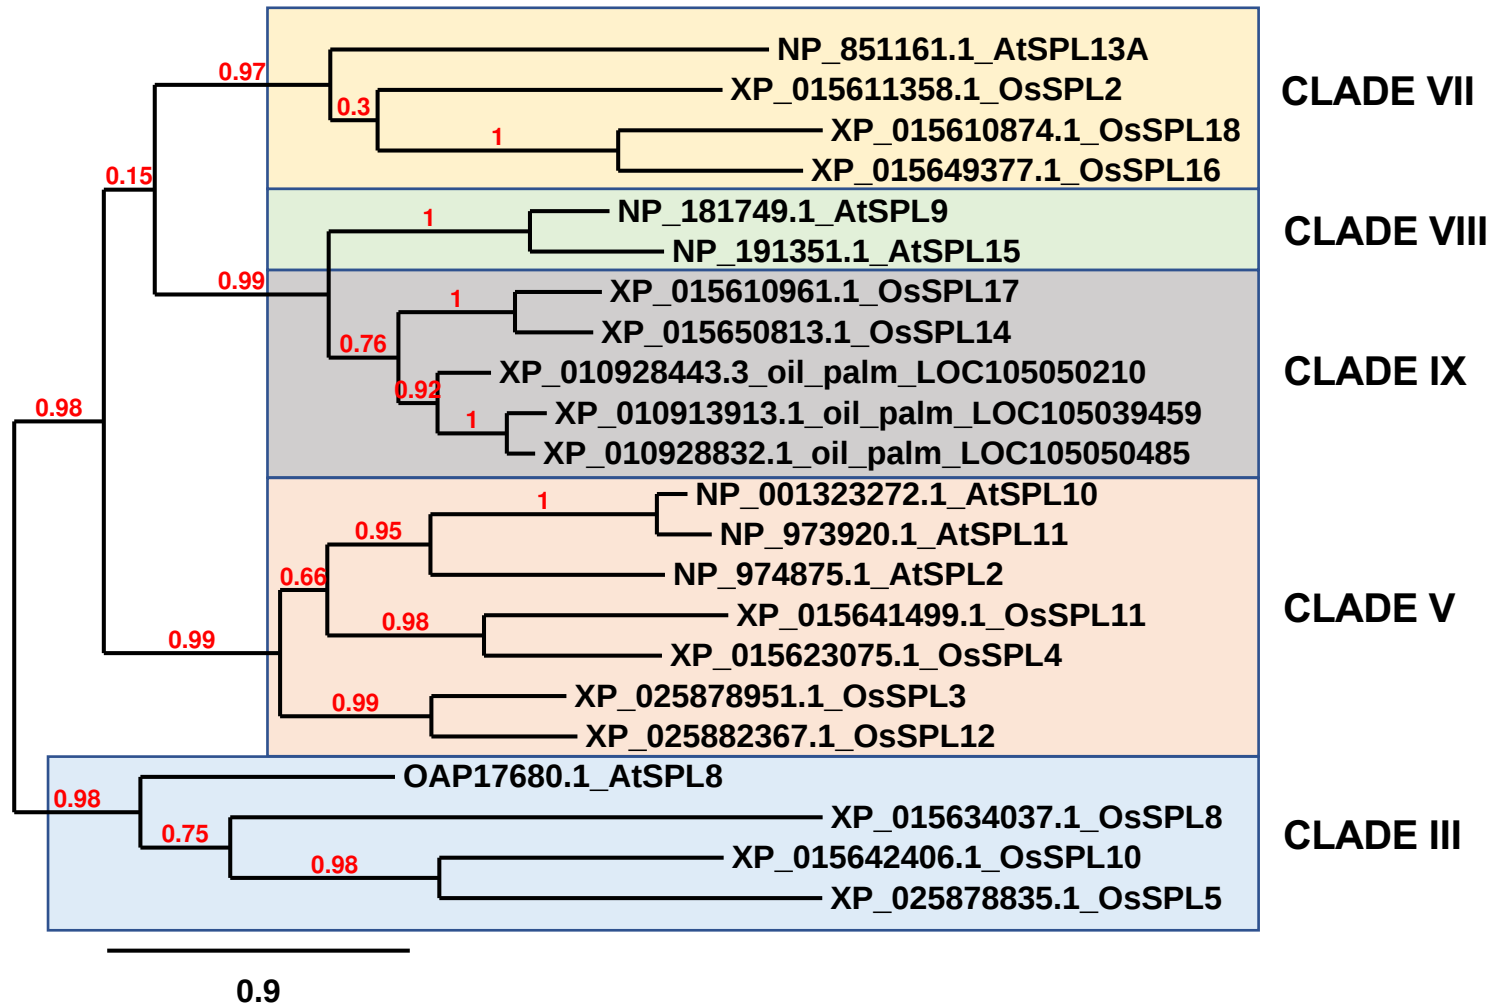

Supplement: s1 [file s1]

**VEGETATIVE  
MERISTEM**

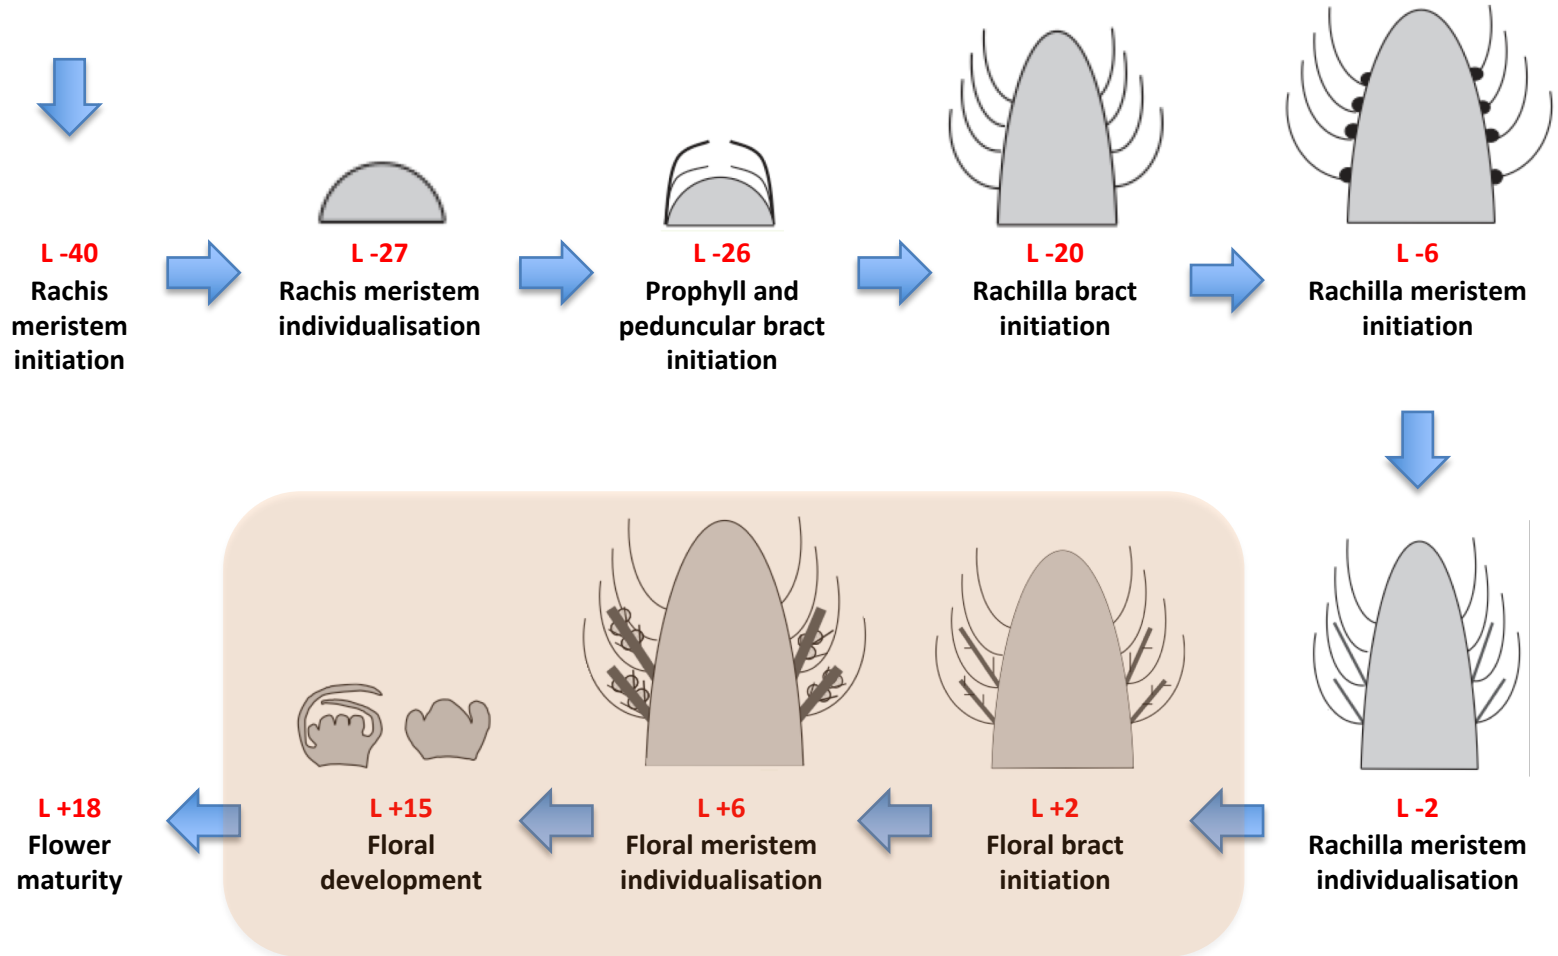

Supplement: s1 [file s1]
